# Supplementary material for: circFBXW7 Inhibits Malignant Progression by Sponging miR-197-3p and Encoding a 185-aa Protein in Triple-Negative Breast Cancer
Source: PubMed Central journal article supplement — Mol Ther Nucleic Acids. 2019 Aug 14;18:88–98. doi: 10.1016/j.omtn.2019.07.023 (PMC6796723; doi:10.1016/j.omtn.2019.07.023), 2019-08-14
Supplement: mmc1.pdf [file mmc1.pdf]

OMTN, Volume 18

## **Supplemental Information**

### **circFBXW7 Inhibits Malignant Progression by Sponging miR-197-3p and Encoding a 185-aa Protein in Triple-Negative Breast Cancer**

**Feng Ye, Guanfeng Gao, Yutian Zou, Shaoquan Zheng, Lijuan Zhang, Xueqi Ou, Xiaoming Xie, and Hailin Tang**

Tables S1. The sequences of primers used in this study.

| <b>Primers (5' → 3')</b> |                          |
|--------------------------|--------------------------|
| circFBXW7-F              | TTACAAAAACAAAATCCGGAGTCT |
| circFBXW7-R              | TTTCCTCTTCCTGGGTCTT      |
| FBXW7-F                  | GCACCGTCAAGGCTGAGAAC     |
| FBXW7-R                  | TGGTGAAGACGCCAGTGGA      |
| miR-197-F                | CGGTAGTCTGATACTGTAA      |
| miR-197-R                | GTGCTCCGAAGGGGGT         |
| β-actin-F                | GAAATCGTGCGTGACATTAA     |
| β-actin-R                | AAGGAAGGCTGGAAGAGTG      |
| GAPDH-F                  | GCACCGTCAAGGCTGAGAAC     |
| GAPDH-R                  | TGGTGAAGACGCCAGTGGA      |
| U6-F                     | CTCGCTTCGGCAGCACA        |
| U6-R                     | AACGCTTCACGAATTTGCGT     |
